# Supplementary material for: cis-Expression QTL Analysis of Established Colorectal Cancer Risk Variants in Colon Tumors and Adjacent Normal Tissue
Source: PubMed Central journal article supplement (PMC3281844; doi:10.1371/journal.pone.0030477), 2012-02-17
Supplement: pone.0030477.s002.pdf [file pone.0030477.s002.pdf]

**Table S1. Differentially expressed genes nominally associated ( $p$ -value < 0.05) with established risk variants for colorectal cancer**

| SNP        | Locus | Tumor/Normal | RefSeq       | Gene Symbol | Gene                                                                               | $p$ -value |
|------------|-------|--------------|--------------|-------------|------------------------------------------------------------------------------------|------------|
| rs6687758  | 1q41  | Tumor        | NM_005681    | TAF1A       | TATA box binding protein (TBP)-associated factor, RNA polymerase I, A              | 0.043      |
| rs6687758  | 1q41  | Normal       | NM_022831    | AIDA        | axin interactor, dorsalization associated                                          | 0.020      |
| rs6687758  | 1q41  | Tumor        | NM_003268    | TLR5        | toll-like receptor 5                                                               | 0.037      |
| rs10936599 | 3q26  | Normal       | NM_001122752 | SERPINI1    | serpin peptidase inhibitor, clade I (neuroserpin)                                  | 0.007      |
| rs10936599 | 3q26  | Normal       | NM_014498    | GOLIM4      | golgi integral membrane protein 4                                                  | 0.024      |
| rs10936599 | 3q26  | Normal       | NM_005602    | CLDN11      | claudin 11                                                                         | 0.012      |
| rs10936599 | 3q26  | Normal       | NM_020949    | SLC7A14     | solute carrier family 7                                                            | 0.003      |
| rs719725   | 9q24  | Normal       | NM_203453    | PPAPDC2     | phosphatidic acid phosphatase type 2 domain containing 2                           | 0.018      |
| rs719725   | 9q24  | Normal       | NM_014143    | CD274       | CD274 molecule                                                                     | 0.020      |
| rs719725   | 9q24  | Normal       | NM_025239    | PDCD1LG2    | programmed cell death 1 ligand 2                                                   | 0.019      |
| rs719725   | 9q24  | Tumor        | NM_017913    | CDC37L1     | cell division cycle 37 homolog (S. cerevisiae)-like 1                              | 0.054      |
| rs719725   | 9q24  | Tumor        | NM_002839    | PTPRD       | protein tyrosine phosphatase, receptor type, D                                     | 0.025      |
| rs10795668 | 10p14 | Tumor        | NM_001001973 | ATP5C1      | ATP synthase, H+ transporting, mitochondrial F1 complex, gamma polypeptide 1       | 0.005      |
| rs3802842  | 11q23 | Tumor        | NM_001562    | IL18        | interleukin 18 (interferon-gamma-inducing factor)                                  | 0.053      |
| rs3802842  | 11q23 | Tumor        | NM_015191    | SIK2        | salt-inducible kinase 2                                                            | 0.027      |
| rs7136702  | 12q13 | Tumor        | NM_052879    | LARP4       | La ribonucleoprotein domain family, member 4                                       | 0.023      |
| rs7136702  | 12q13 | Tumor        | NM_182559    | TMPRSS12    | transmembrane protease, serine 12                                                  | 0.043      |
| rs7136702  | 12q13 | Tumor        | NM_005653    | TFCP2       | transcription factor CP2                                                           | 0.005      |
| rs7136702  | 12q13 | Tumor        | NM_007210    | GALNT6      | UDP-N-acetyl-alpha-D-galactosamine:polypeptide N-acetylgalactosaminyltransferase 6 | 0.016      |
| rs7136702  | 12q13 | Tumor        | NM_002284    | KRT86       | keratin 86                                                                         | 0.043      |
| rs7136702  | 12q13 | Tumor        | NM_020039    | ACCN2       | amiloride-sensitive cation channel 2, neuronal                                     | 0.052      |
| rs4444235  | 14q22 | Tumor        | NM_007086    | WDHD1       | WD repeat and HMG-box DNA binding protein 1                                        | 0.038      |
| rs4444235  | 14q22 | Tumor        | NR_003225    | LGALS3      | lectin, galactoside-binding, soluble, 3                                            | 0.028      |
| rs4444235  | 14q22 | Tumor        | NM_014750    | DLGAP5      | discs, large (Drosophila) homolog-associated protein 5                             | 0.006      |
| rs4779584  | 15q13 | Normal       | NM_018648    | NOP10       | NOP10 ribonucleoprotein homolog (yeast)                                            | 0.006      |
| rs4779584  | 15q13 | Tumor        | NM_017762    | MTMR10      | myotubularin related protein 10                                                    | 0.053      |
| rs4779584  | 15q13 | Tumor        | NM_018648    | NOP10       | NOP10 ribonucleoprotein homolog (yeast)                                            | 0.054      |
| rs9929218  | 16q22 | Normal       | NM_133458    | ZFP90       | zinc finger protein 90 homolog (mouse)                                             | 0.033      |
| rs9929218  | 16q22 | Normal       | NM_013241    | FHOD1       | formin homology 2 domain containing 1                                              | 0.030      |
| rs9929218  | 16q22 | Normal       | NM_145059    | FUK         | fucokinase                                                                         | 0.007      |
| rs9929218  | 16q22 | Normal       | NM_012163    | LRRC29      | leucine rich repeat containing 29                                                  | 0.005      |
| rs9929218  | 16q22 | Normal       | NM_032382    | COG8        | component of oligomeric golgi complex 8                                            | 0.032      |
| rs9929218  | 16q22 | Normal       | NM_018430    | TSNAXIP1    | translin-associated factor X interacting protein 1                                 | 0.036      |
| rs9929218  | 16q22 | Normal       | NM_001040667 | HSF4        | heat shock transcription factor 4                                                  | 0.008      |
| rs9929218  | 16q22 | Normal       | NM_138383    | MTSS1L      | metastasis suppressor 1-like                                                       | 0.038      |
| rs9929218  | 16q22 | Normal       | NM_033309    | B3GNT9      | UDP-GlcNAc:betaGal beta-1,3-N-acetylglucosaminyltransferase 9                      | 0.011      |
| rs9929218  | 16q22 | Normal       | NM_002801    | PSMB10      | proteasome (prosome, macropain) subunit, beta type, 10                             | 0.025      |
| rs9929218  | 16q22 | Normal       | NM_003946    | NOL3        | nucleolar protein 3 (apoptosis repressor with CARD domain)                         | 0.0003     |
| rs9929218  | 16q22 | Normal       | NM_018380    | DDX28       | DEAD (Asp-Glu-Ala-Asp) box polypeptide 28 // 16q22.1                               | 0.002      |
| rs9929218  | 16q22 | Normal       | NM_020786    | PDP2        | pyruvate dehydrogenase phosphatase isoenzyme 2                                     | 0.040      |
| rs9929218  | 16q22 | Tumor        | NM_018430    | TSNAXIP1    | translin-associated factor X interacting protein 1                                 | 0.046      |
| rs961253   | 20p12 | Normal       | NM_001009924 | C2orf30     | chromosome 20 open reading frame 30                                                | 0.028      |
| rs4925386  | 20q13 | Normal       | BC002531     | C2orf149    | chromosome 20 open reading frame 149                                               | 0.011      |
| rs4925386  | 20q13 | Normal       | NM_020062    | SLC2A4RG    | SLC2A4 regulator                                                                   | 0.016      |
| rs4925386  | 20q13 | Normal       | NM_012469    | PRPF6       | PRP6 pre-mRNA processing factor 6 homolog (S. cerevisiae)                          | 0.036      |
| rs4925386  | 20q13 | Normal       | NM_018257    | PCMTD2      | protein-L-isoaspartate (D-aspartate) O-methyltransferase domain containing 2       | 0.054      |
| rs4925386  | 20q13 | Tumor        | NM_144498    | OSBPL2      | oxysterol binding protein-like 2                                                   | 0.024      |
| rs4925386  | 20q13 | Tumor        | NM_020882    | COL20A1     | collagen, type XX, alpha 1                                                         | 0.052      |
| rs4925386  | 20q13 | Tumor        | NM_012384    | GMEB2       | glucocorticoid modulatory element binding protein 2                                | 0.032      |
| rs4925386  | 20q13 | Tumor        | NM_032957    | RTEL1       | regulator of telomere elongation helicase 1                                        | 0.026      |
